# Supplementary material for: Regulation of Amylose Content by Single Mutations at an Active Site in the Wx-B1 Gene in a Tetraploid Wheat Mutant
Source: MDPI journal article supplement (doi:10.3390/ijms23158432), 2022-07-29
Supplement: s1 [file s1]

# Supplementary Materials:

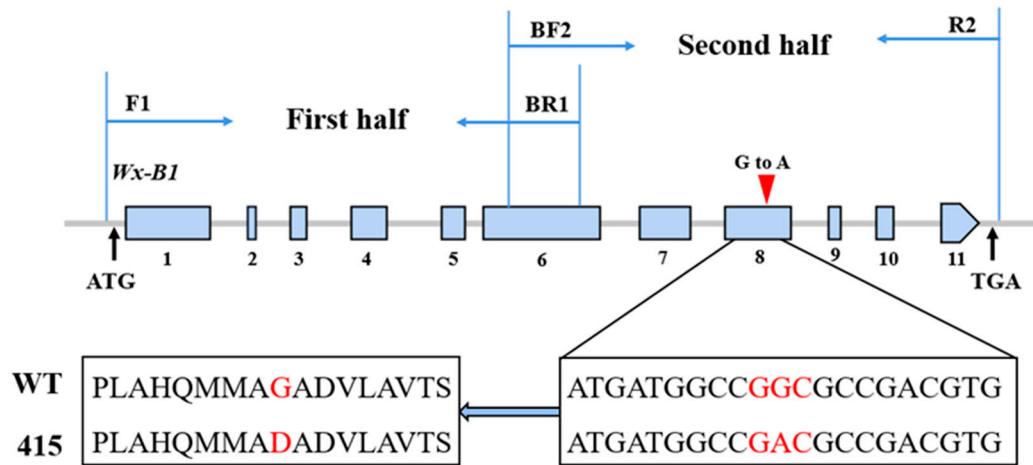

**Figure S1.** Analysis of *Wx-B1* gene sequences in wheat parental WT and mutant M3-415 lines.

## Step 1: Amplification of Primary Fragments

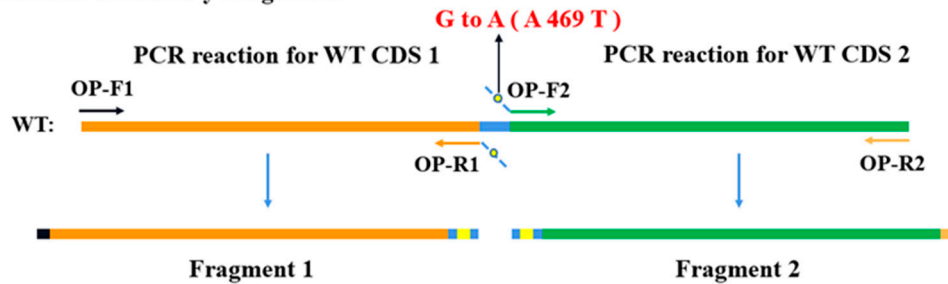

## Step 2: Overlapping PCR reaction

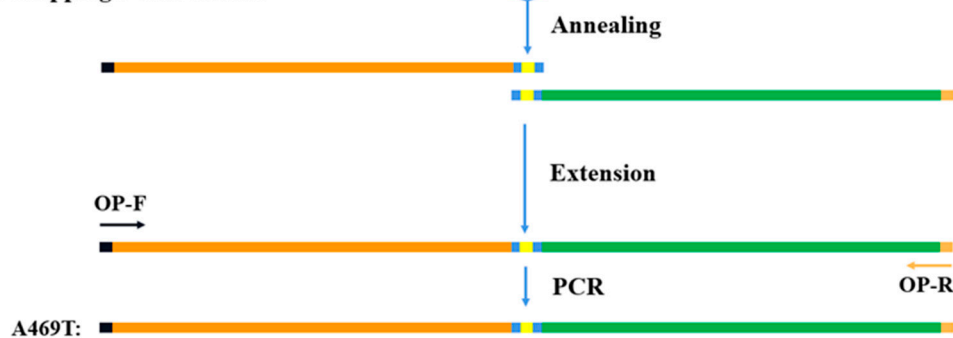

**Figure S2.** Schematic diagram of the PCR site-directed mutagenesis of the *Wx-B1* gene conducted using the overlap extension method. In step 1, touchdown PCR was used to generate PCR fragments that contained a 20-bp *Wx-B1* sequence overlap (blue portion of primers OP-F2 and OP-R1, yellow portion of site-directed mutagenesis position) at the 3' end of Fragment 1 and 5' end of Fragment 2. In step 2, the two fragments were used to generate a full length *Wx-B1* coding sequence via overlap PCR.

**Table S1.** Primers used in this study.

| Primers | Sequence (5'-3')                        | T <sub>m</sub> (°C) | Description                |
|---------|-----------------------------------------|---------------------|----------------------------|
| F1      | ATGGCGGCTCTGGTCACGT                     | 60                  | <i>Wx-B1</i> amplification |
| BR1     | ACGATGCCGGTGATGCCC                      | 59                  |                            |
| BF2     | GTTCTGCATCCACAACATCTCGTAT               | 60                  |                            |
| R2      | TCAGGGAGCGGCGACGTT                      | 60                  | <i>Wx-B1</i> amplification |
| OP-F    | ATGGCGGCTCTGGTCACG                      | 60                  |                            |
| OP-R    | TCAGGGAGCGGCGACGTT                      | 60                  |                            |
| OP-F1   | ATGGCGGCTCTGGTCACGTCGCAG                | 61                  | TB-1 amplification         |
| OP-R1   | CGCCGGTCATCATCTGGTGA                    | 60                  |                            |
| OP-F2   | TCACCAGATGATGACCGGCG                    | 59                  |                            |
| OP-R2   | TCAGGGAGCGGCGACGTTCTCCATG               | 60                  | TB-1 amplification         |
| TY-F    | ATCGGATCCGAATTCGAGCTCATGGCGGCTCTGGTCACG | 62                  |                            |
| TY-R    | CTCGAGTGCGGCCGCAAGCTTTCAGGGAGCGGCGACGTT | 64                  |                            |
| GAPDH-F | AACTGTTTCATGCCATCACTGCCAC               | 58                  | Internal control gene      |
| GAPDH-R | AGGACATACCAGTGAGCTTGCCAT                | 60                  |                            |
| Actin-F | GTTCCAATCTATAAGGGATACACGC               | 60                  |                            |
| Actin-R | GAACCTCCACTGAGAACAACATTACC              | 60                  | Internal control gene      |
| Wx-F    | CTCAACAAACAACCCATACTTCTCC               | 60                  |                            |
| Wx-R    | CGCTACCTTGGCCGTCCTA                     | 58                  |                            |
